# Supplementary material for: Global distribution and variability of subsurface chlorophyll a concentrations
Source: Copernicus journal article supplement (doi:10.5194/os-18-255-2022), 2022-02-24
Supplement: Supplementary file 1 [file os-18-255-2022-supplement.pdf]

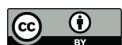

*Supplement of*

## **Global distribution and variability of subsurface chlorophyll *a* concentrations**

**Sayaka Yasunaka et al.**

*Correspondence to:* Sayaka Yasunaka ([yasunaka@jamstec.go.jp](mailto:yasunaka@jamstec.go.jp))

The copyright of individual parts of the supplement might differ from the article licence.

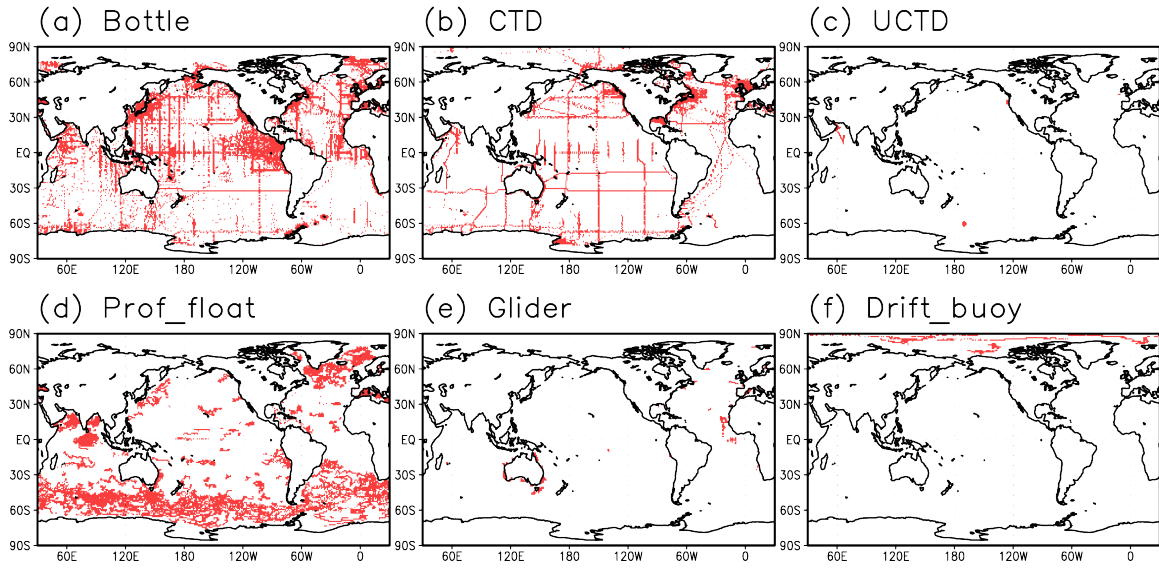

**Figure S1.** Data distribution of Chl-*a* concentrations from (a) bottle samples, (b) CTD fluorescence, (c) underway CTD fluorescence, (d) profiling floats, (e) glider, and (f) drifting buoys.

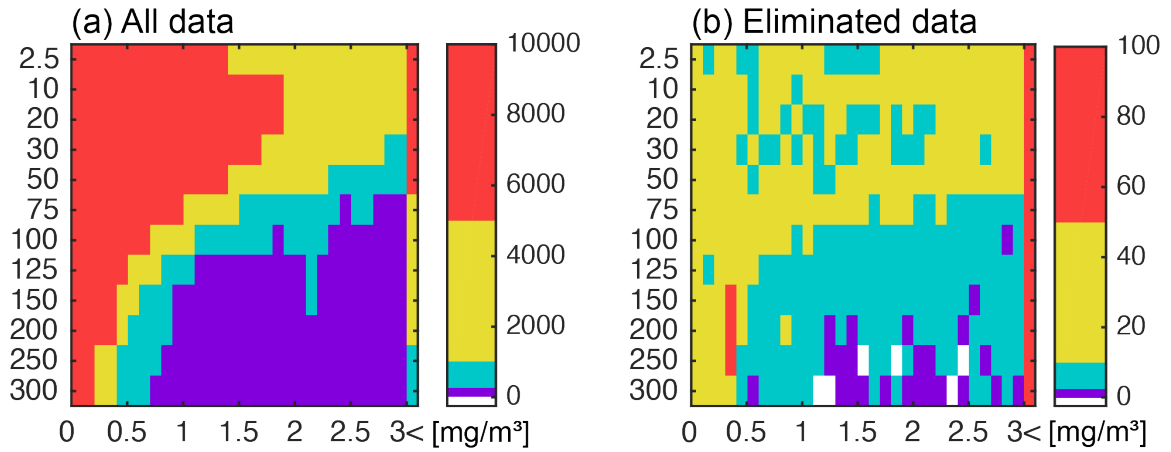

**Figure S2.** (a) Number of the Chl-*a* data and (b) number of eliminated data in each bin (every  $0.1 \text{ mg/m}^3$  in  $< 3 \text{ mg/m}^3$  and all the rest) of concentration and depth.

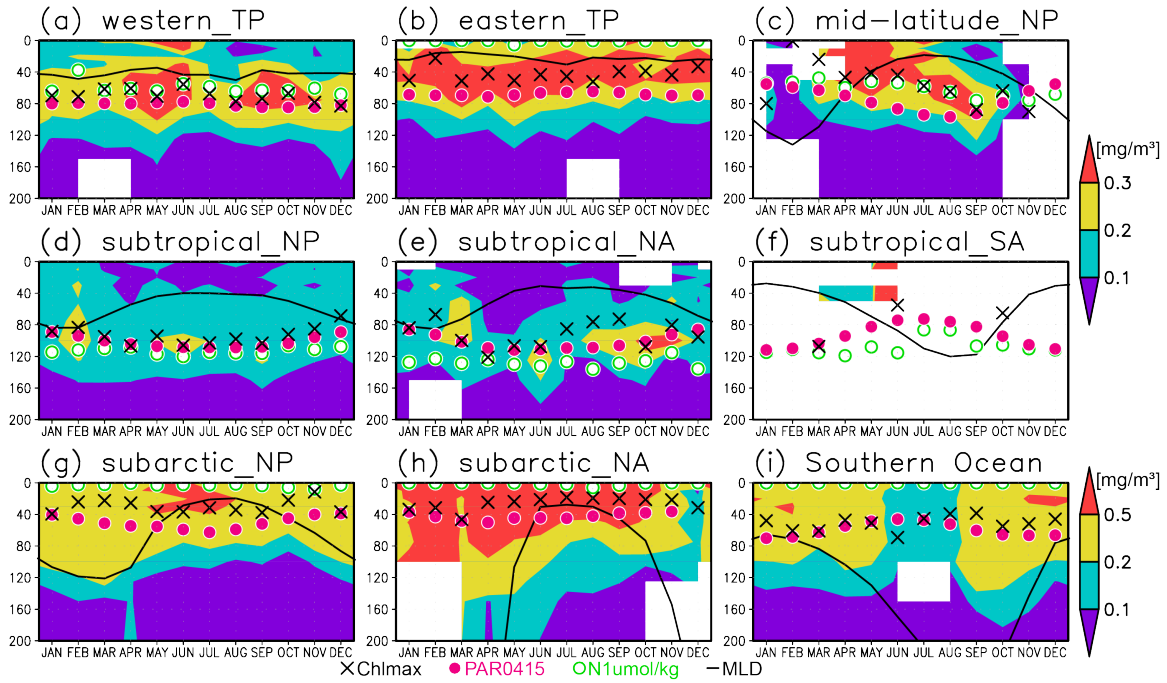

**Figure S3.** Seasonal evolution of chlorophyll a (Chl-a) concentrations with the Chl-a maximum from bottle sampled data (black cross), 0.415  $\text{mol-quanta/m}^2/\text{day}$  of photosynthetically available radiation (magenta dot), 1  $\mu\text{mol/kg}$  of nitrate (green open circle), and mixed layer (black solid line) at (a) 2°S to 2°N, 120–170°E (western tropical Pacific), (b) 2°S to 2°N, 120–90°W (eastern tropical Pacific), (c) 30–40°N, 150–130°W (midlatitude North Pacific), (d) 10–30°N, 120°E to 120°W (subtropical North Pacific), (e) 15–30°N, 70–30°W (subtropical North Atlantic), (f) 30–10°S, 50–0°W (subtropical South Atlantic), (g) 40–55°N, 160°E to 155°W (subarctic North Pacific), (h) 50–70°N, 30–0°W (subarctic North Atlantic), and (i) 60–45°S (Southern Ocean).

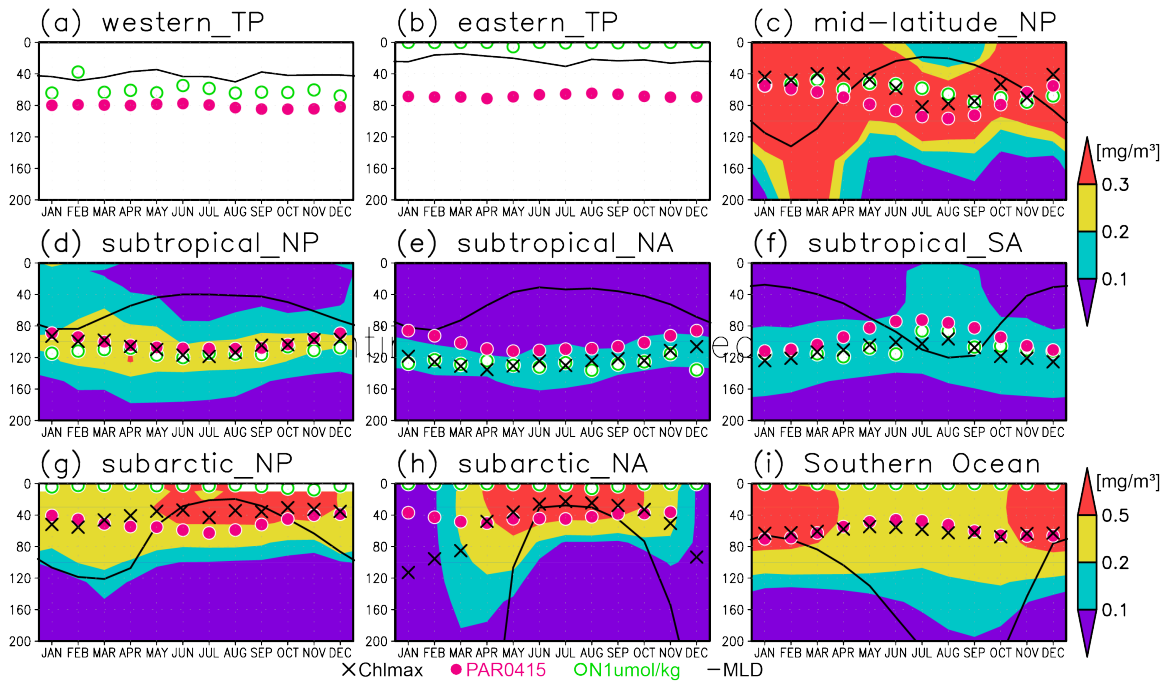

**Figure S4.** As Figure S3 but using data from profiling floats.
